# Supplementary material for: Polymorphism in cocrystals of metronidazole benzoate
Source: Royal Society of Chemistry journal article supplement (doi:10.1039/d3ce00103b), 2023-01-01
Supplement: d3ce00103b1.pdf [file d3ce00103b1.pdf]

SUPPLEMENTARY INFORMATION

**Polymorphism in cocrystals of metronidazole benzoate**

Wendell Saraiva Costa<sup>a</sup>, Yara Santiago de Oliveira<sup>b</sup>, and Alejandro Pedro Ayala<sup>c\*</sup>

<sup>a</sup> *Department of Pharmacy. Federal University of Ceará. Fortaleza, Ceará, Brazil.*

<sup>b</sup> *Institute of Health Sciences. University of International Integration of the Afro-Brazilian Lusophony, Redenção - CE, Brazil.*

<sup>c</sup> *Department of Physics. Federal University of Ceará. Fortaleza, Ceará, Brazil.*

**Table S1.** Crystal data and refinement parameters of BZMDSL C polymorphs I and II.

| Parameter                                   | Polymorph I                                                   | Polymorph II                                                  |
|---------------------------------------------|---------------------------------------------------------------|---------------------------------------------------------------|
| CCDC                                        | 1890433                                                       | 1892488                                                       |
| Empirical formula                           | C <sub>20</sub> H <sub>19</sub> N <sub>3</sub> O <sub>7</sub> | C <sub>20</sub> H <sub>19</sub> N <sub>3</sub> O <sub>7</sub> |
| Formula weight                              | 413.38                                                        | 413.38                                                        |
| Temperature/K                               | 301.34                                                        | 295.85                                                        |
| Crystal system                              | Monoclinic                                                    | Monoclinic                                                    |
| Space group                                 | P2 <sub>1</sub> /c                                            | P2 <sub>1</sub> /c                                            |
| a/Å                                         | 9.5055 (6)                                                    | 10.645 (3)                                                    |
| b/Å                                         | 31.2239 (19)                                                  | 21.957 (8)                                                    |
| c/Å                                         | 6.8578 (4)                                                    | 8.674 (3)                                                     |
| β/°                                         | 102.628 (2)                                                   | 91.131 (11)                                                   |
| Volume/Å <sup>3</sup>                       | 1986.2 (2)                                                    | 2027.0 (12)                                                   |
| Z                                           | 4                                                             | 4                                                             |
| ρ <sub>calc</sub> /cm <sup>3</sup>          | 1.382                                                         | 1.355                                                         |
| μ/mm <sup>-1</sup>                          | 0.106                                                         | 0.104                                                         |
| F (000)                                     | 864.0                                                         | 864.0                                                         |
| Crystal size/mm <sup>3</sup>                | 0.678 × 0.244 × 0.16                                          | 0.285 × 0.181 × 0.08                                          |
| Radiation                                   | MoKα (λ = 0.71073)                                            | MoKα (λ = 0.71073)                                            |
| 2Θ range for data collection/°              | 5.884 to 55.016                                               | 5.05 to 52.034                                                |
| Index ranges                                | -12 ≤ h ≤ 12, -40 ≤ k ≤ 40,<br>-8 ≤ l ≤ 8                     | -13 ≤ h ≤ 12, -27 ≤ k ≤ 27,<br>-10 ≤ l ≤ 10                   |
| Reflections collected                       | 69959                                                         | 16752                                                         |
| Independent reflections                     | 4553 [R <sub>int</sub> = 0.0348]                              | 3980 [R <sub>int</sub> = 0.1226]                              |
| Data/restraints/parameters                  | 4553/0/277                                                    | 3980/0/274                                                    |
| Goodness-of-fit on F <sup>2</sup>           | 1.048                                                         | 1.001                                                         |
| Final R indexes [I>=2σ (I)]                 | R <sub>1</sub> = 0.0429, wR <sub>2</sub> = 0.1111             | R <sub>1</sub> = 0.0634, wR <sub>2</sub> = 0.1191             |
| Final R indexes [all data]                  | R <sub>1</sub> = 0.0496, wR <sub>2</sub> = 0.1182             | R <sub>1</sub> = 0.1677, wR <sub>2</sub> = 0.1633             |
| Largest diff. peak/hole / e Å <sup>-3</sup> | 0.16/-0.20                                                    | 0.17/-0.24                                                    |

**Table S2.** Hydrogen-bonds of polymorphs I and II of BZMDSL C.

| BZMDSL C-I             |           |             |             |                 |            |
|------------------------|-----------|-------------|-------------|-----------------|------------|
| Donor – H ... Acceptor | D – H (Å) | H ... A (Å) | D ... A (Å) | D – H ... A (°) | Type       |
| O1A–H1A...N2           | 0.89      | 1.85        | 2.6610 (18) | 170             | <i>i</i>   |
| C4A–H4AA...O1          | 0.93      | 2.43        | 3.270 (2)   | 151             | <i>ii</i>  |
| C2–H2...O3A            | 0.93      | 2.55        | 3.4504 (19) | 163             | <i>ii</i>  |
| C10–H10...O2           | 0.93      | 2.58        | 3.486 (2)   | 164             | <i>iii</i> |
| O3A–H3A...O2A          | 0.82      | 1.90        | 2.6218(18)  | 145             | Intra      |
| C7A–H7A...O1A          | 0.93      | 2.40        | 2.721 (2)   | 100             | Intra      |
| C5–H5A...O2            | 0.97      | 2.46        | 2.8282 (2)  | 102             | Intra      |
| C6–H6B...O2            | 0.97      | 2.43        | 3.0062(19)  | 118             | Intra      |
| BZMDSL C-II            |           |             |             |                 |            |
| Donor – H ... Acceptor | D – H (Å) | H ... A (Å) | D ... A (Å) | D – H ... A (°) | Type       |
| O1A–H1A...N2           | 0.82      | 1.82        | 2.632 (4)   | 170             | <i>i</i>   |
| O3A–H3A...O4           | 0.82      | 2.60        | 3.171 (4)   | 128             | <i>ii</i>  |
| C5–H5B...O4            | 0.97      | 2.36        | 3.251 (4)   | 152             | <i>iv</i>  |
| C6–H6B...O2A           | 0.97      | 2.40        | 3.206 (4)   | 140             | <i>ii</i>  |
| C9–H9...O1             | 0.93      | 2.58        | 3.288 (5)   | 134             | <i>ii</i>  |
| O3A–H3A...O2A          | 0.82      | 1.87        | 2.588 (4)   | 145             | Intra      |
| C5–H5A...O2            | 0.97      | 2.50        | 2.864 (4)   | 102             | Intra      |
| C6–H6B...O2            | 0.97      | 2.46        | 3.078 (4)   | 121             | Intra      |

(i) x,y,z ; (ii) 1-x,1-y,1-z; (iii) -1+x,3/2-y,1/2+z; (iv) x,1/2-y,1/2+z

**Table S3.** Centroid distances of  $\pi$ - $\pi$  stacking on polymorphs I and II of BZMDSLCL.

| Polymorph I  |       |            |          |      |       |             |             |          |
|--------------|-------|------------|----------|------|-------|-------------|-------------|----------|
| Cg(I)        | Cg(J) | Cg-Cg      | Alpha    | Beta | Gamma | CgI_Perp    | CgJ_Perp    | Slippage |
| Cg3          | Cg3   | 3.5952(9)  | 0.00(7)  | 12   | 12    | 3.5170(6)   | 3.5169(6)   | 0.746    |
| Cg1          | Cg3   | 3.6280(9)  | 5.22(7)  | 21.3 | 19.9  | -3.4113(6)  | -3.3813(6)  | 1.315    |
| Cg3          | Cg1   | 3.6280(9)  | 5.22(7)  | 19.9 | 21.3  | -3.3813(6)  | -3.4113(6)  | 1.235    |
| Cg2          | Cg2   | 4.0737(10) | 11.25(8) | 38.7 | 27.7  | 3.6084(7)   | -3.1773(7)  | 2.549    |
| Cg2          | Cg2   | 4.0737(10) | 11.25(8) | 27.7 | 38.7  | -3.1773(7)  | 3.6084(7)   | 1.891    |
| Cg1          | Cg2   | 4.9729(10) | 67.37(8) | 12.5 | 72.4  | 1.5051(6)   | 4.8557(7)   |          |
| Polymorph II |       |            |          |      |       |             |             |          |
| Cg(I)        | Cg(J) | Cg-Cg      | Alpha    | Beta | Gamma | CgI_Perp    | CgJ_Perp    | Slippage |
| Cg1          | Cg1   | 3.846(2)   | 0.00(19) | 30.9 | 30.9  | -3.3013(14) | -3.3013(14) | 1.973    |
| Cg1          | Cg3   | 4.010(3)   | 3.3(2)   | 29.5 | 32.5  | 3.3812(14)  | 3.4898(18)  | 1.975    |
| Cg3          | Cg1   | 4.010(3)   | 3.3(2)   | 32.5 | 29.5  | 3.4896(18)  | 3.3812(14)  | 2.155    |
| Cg2          | Cg3   | 4.581(3)   | 53.8(2)  | 50.3 | 10.2  | -4.5089(18) | 2.929(2)    |          |
| Cg3          | Cg2   | 4.581(3)   | 53.8(2)  | 10.2 | 50.3  | 2.929(2)    | -4.5091(18) |          |
| Cg2          | Cg2   | 5.439(3)   | 79.7(2)  | 16.6 | 88.1  | 0.1764(18)  | -5.2130(18) |          |
| Cg2          | Cg3   | 5.729(4)   | 75.4(2)  | 31.9 | 72.7  | -1.7031(18) | -4.864(2)   |          |

Cg1 -&gt; imidazole; Cg2 -&gt; phenyl; Cg3 -&gt; salicylic

**Table S4.** Crystal data and refinement parameters of BZMDFMA polymorphs I and II.

| Parameter                                   | Polymorph I                                                   | Polymorph II                                                  |
|---------------------------------------------|---------------------------------------------------------------|---------------------------------------------------------------|
| CCDC                                        | 1890426                                                       | 1892489                                                       |
| Empirical formula                           | C <sub>15</sub> H <sub>15</sub> N <sub>3</sub> O <sub>6</sub> | C <sub>15</sub> H <sub>15</sub> N <sub>3</sub> O <sub>6</sub> |
| Formula weight                              | 333.30                                                        | 333.30                                                        |
| Temperature/K                               | 273.15                                                        | 273.15                                                        |
| Crystal system                              | Monoclinic                                                    | Orthorhombic                                                  |
| Space group                                 | P2 <sub>1</sub> /c                                            | Pbca                                                          |
| a/Å                                         | 9.0358 (5)                                                    | 7.2928 (5)                                                    |
| b/Å                                         | 26.6419 (14)                                                  | 17.0257 (9)                                                   |
| c/Å                                         | 6.8796 (3)                                                    | 25.6078 (16)                                                  |
| $\beta$ /°                                  | 102.419 (2)                                                   |                                                               |
| Volume/Å <sup>3</sup>                       | 1617.38 (14)                                                  | 3179.6 (3)                                                    |
| Z                                           | 4                                                             | 4                                                             |
| $\rho_{\text{calc}}/\text{cm}^3$            | 1.369                                                         | 1.393                                                         |
| $\mu/\text{mm}^{-1}$                        | 0.108                                                         | 0.110                                                         |
| F (000)                                     | 696.0                                                         | 1392.0                                                        |
| Crystal size/mm <sup>3</sup>                | 0.632 × 0.172 × 0.168                                         | 0.228 × 0.198 × 0.105                                         |
| Radiation                                   | MoK $\alpha$ ( $\lambda$ = 0.71073)                           | MoK $\alpha$ ( $\lambda$ = 0.71073)                           |
| 2 $\Theta$ range for data collection/°      | 5.538 to 55.056                                               | 5.042 to 54.19                                                |
| Index ranges                                | -11 ≤ h ≤ 11, -34 ≤ k ≤ 34,<br>-8 ≤ l ≤ 8                     | -9 ≤ h ≤ 9, -21 ≤ k ≤ 21,<br>-32 ≤ l ≤ 32                     |
| Reflections collected                       | 46849                                                         | 60358                                                         |
| Independent reflections                     | 3705 [R <sub>int</sub> = 0.0658]                              | 3511 [R <sub>int</sub> = 0.1521]                              |
| Data/restraints/parameters                  | 3705/0/219                                                    | 3511/0/218                                                    |
| Goodness-of-fit on F <sup>2</sup>           | 1.044                                                         | 1.007                                                         |
| Final R indexes [I ≥ 2 $\sigma$ (I)]        | R <sub>1</sub> = 0.0542, wR <sub>2</sub> = 0.1330             | R <sub>1</sub> = 0.0575, wR <sub>2</sub> = 0.1285             |
| Final R indexes [all data]                  | R <sub>1</sub> = 0.0783, wR <sub>2</sub> = 0.1544             | R <sub>1</sub> = 0.1387, wR <sub>2</sub> = 0.1771             |
| Largest diff. peak/hole / e Å <sup>-3</sup> | 0.37/-0.32                                                    | 0.20/-0.30                                                    |

**Table S5.** Hydrogen-bonds of polymorphs I and II of BZMDFMA.

| <b>BZMDFMA-I</b>       |           |             |             |                 |            |
|------------------------|-----------|-------------|-------------|-----------------|------------|
| Donor – H ... Acceptor | D – H (Å) | H ... A (Å) | D ... A (Å) | D – H ... A (°) | Type       |
| O1A–H1A...N2           | 0.82      | 1.84        | 2.655 (3)   | 172             | <i>i</i>   |
| C2A–H2A...O1           | 0.93      | 2.45        | 3.286 (3)   | 149             | <i>ii</i>  |
| C4–H4A...O2A           | 0.96      | 2.58        | 3.440 (3)   | 149             | <i>iii</i> |
| C2–H2...O2A            | 0.93      | 2.57        | 3.496 (3)   | 176             | <i>ii</i>  |
| C2A–H2A...O1A          | 0.93      | 2.41        | 2.745 (3)   | 101             | Intra      |
| C5–H5A...O2            | 0.97      | 2.39        | 2.831 (3)   | 107             | Intra      |
| <b>BZMDFMA-II</b>      |           |             |             |                 |            |
| Donor – H ... Acceptor | D – H (Å) | H ... A (Å) | D ... A (Å) | D – H ... A (°) | Type       |
| O1A–H1A...N2           | 0.82      | 1.89        | 2.661 (3)   | 156             | <i>i</i>   |
| C2–H2...O2A            | 0.93      | 2.20        | 3.101 (5)   | 163             | <i>iv</i>  |
| C9–H9...O3             | 0.93      | 2.41        | 2.729 (5)   | 100             | Intra      |
| C5–H5A...O2            | 0.97      | 2.39        | 2.851 (4)   | 108             | Intra      |

(*i*) x,y,z ; (*ii*) 1-x,1-y,-z; (*iii*) x,y,1+z; (*iv*) -1/2+x,3/2-y,1-z

**Table S6.** Centroid distances of  $\pi$ - $\pi$  stacking on polymorphs I and II of BZMDFMA.

| <b>Polymorph I</b>  |       |            |           |      |       |            |            |          |
|---------------------|-------|------------|-----------|------|-------|------------|------------|----------|
| Cg(I)               | Cg(J) | Cg-Cg      | Alpha     | Beta | Gamma | CgI_Perp   | CgJ_Perp   | Slippage |
| Cg2                 | Cg2   | 4.0001(14) | 6.34(11)  | 28.6 | 34.7  | 3.2869(10) | 3.5128(10) | 1.914    |
| Cg2                 | Cg2   | 4.0002(14) | 6.34(11)  | 34.7 | 28.6  | 3.5128(10) | 3.2870(10) | 2.280    |
| Cg1                 | Cg1   | 4.6885(12) | 0.02(12)  | 49.4 | 49.4  | 3.0500(8)  | 3.0501(8)  | 3.561    |
| Cg1                 | Cg2   | 4.9059(14) | 64.94(12) | 19.4 | 70.0  | 1.6748(9)  | 4.6275(10) |          |
| <b>Polymorph II</b> |       |            |           |      |       |            |            |          |
| Cg(I)               | Cg(J) | Cg-Cg      | Alpha     | Beta | Gamma | CgI_Perp   | CgJ_Perp   | Slippage |
| Cg2                 | Cg2   | 4.0684(19) | 11.70(15) | 37.3 | 27.7  | 3.6026(13) | 3.2348(13) | 2.467    |
| Cg2                 | Cg2   | 4.0684(19) | 11.70(15) | 27.7 | 37.3  | 3.2348(13) | 3.6026(13) | 1.890    |
| Cg1                 | Cg2   | 5.6299(18) | 78.67(16) | 26.4 | 75.7  | 1.3868(13) | 5.0439(14) |          |

Cg1 → imidazole; Cg2 → phenyl.

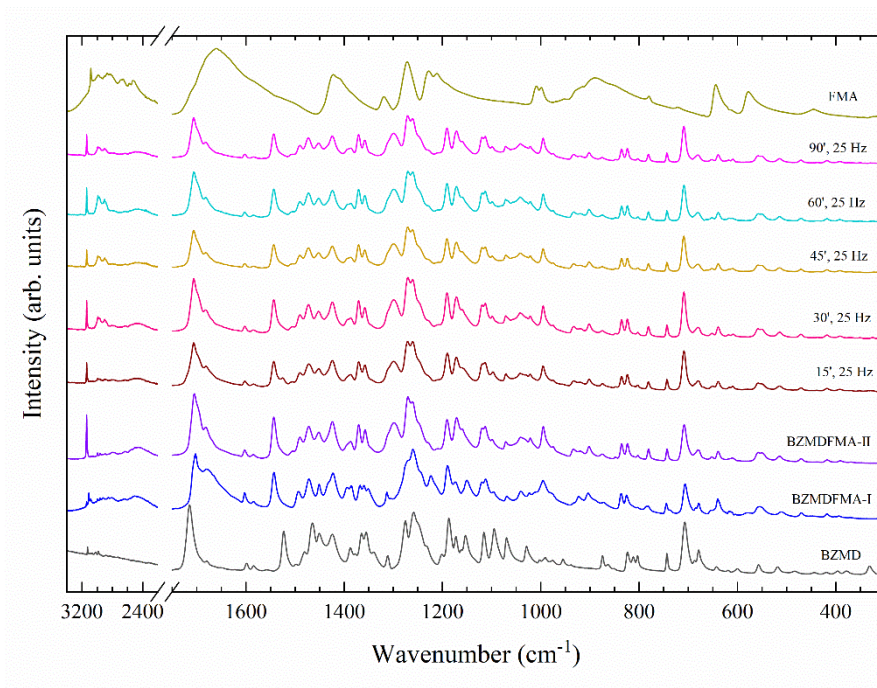

**Figure S1.** FT-IR spectra of the physical mixture of BZMD and FMA as a function of the neat grinding time compared to the BZMD and BZMDFMA polymorphs spectra.

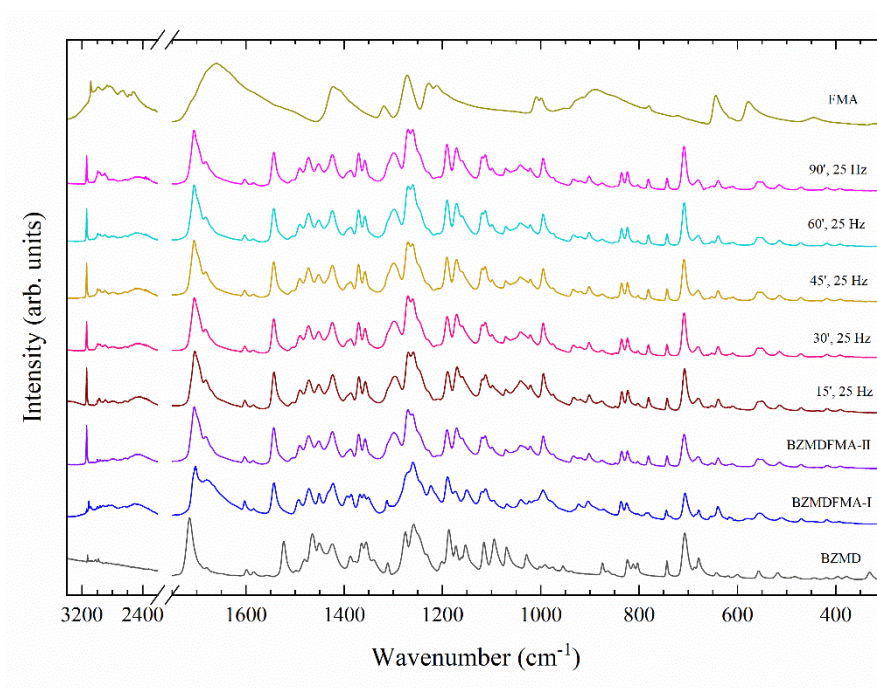

**Figure S2.** FT-IR spectra of the physical mixture of BZMD and FMA as a function of ethanol-assisted grinding time compared to the BZMD and BZMDFMA polymorphs spectra.



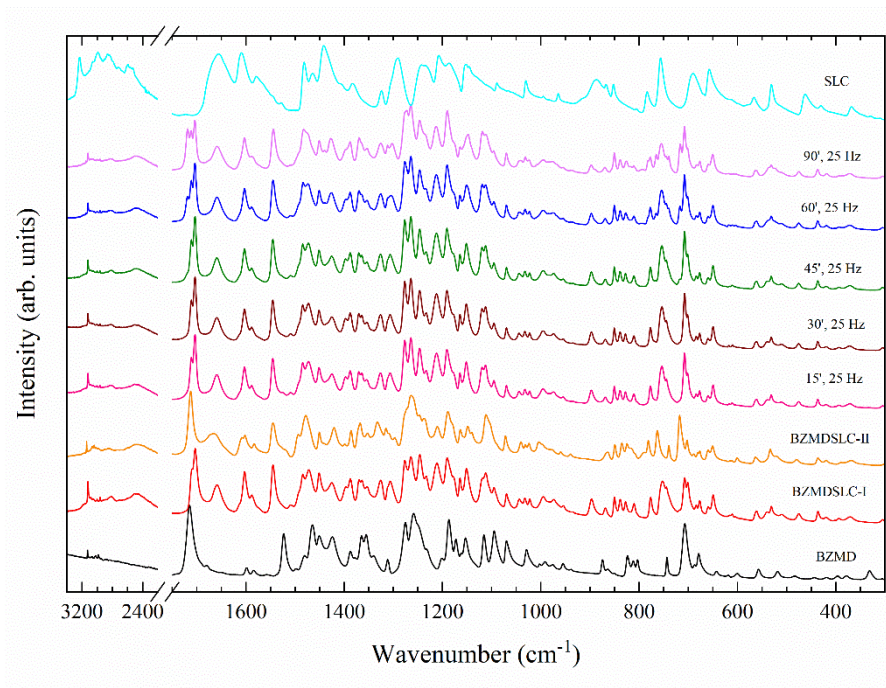

**Figure S3.** FT-IR spectra of the physical mixture of BZMD and SLC as a function of the neat grinding time compared to the BZMD and BZMDSL-C polymorphs spectra.

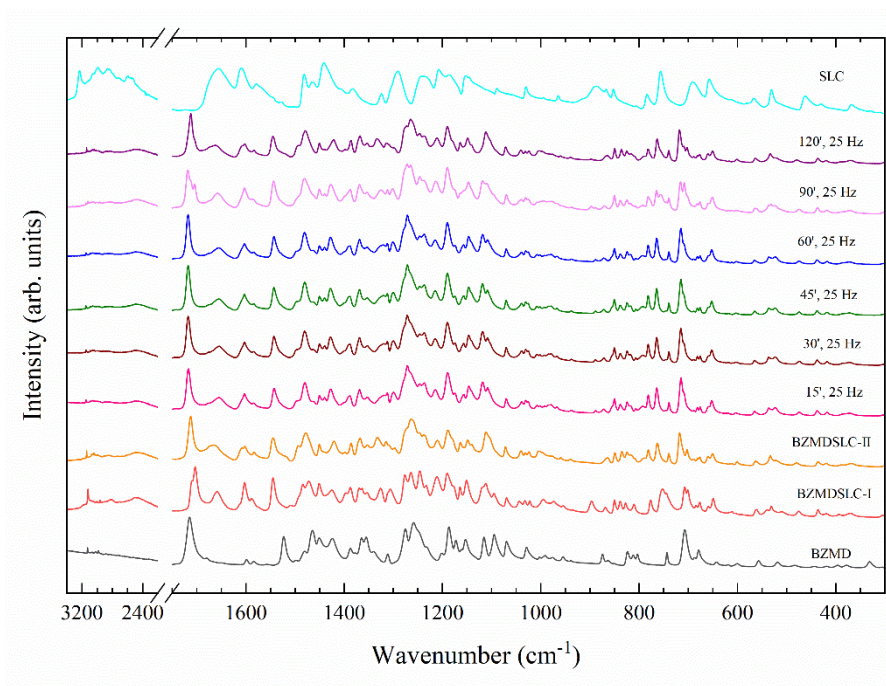

**Figure S4.** FT-IR spectra of the physical mixture of BZMD and SLC as a function of the ethanol-assisted grinding time compared to the BZMD and BZMDSL-C polymorphs spectra.

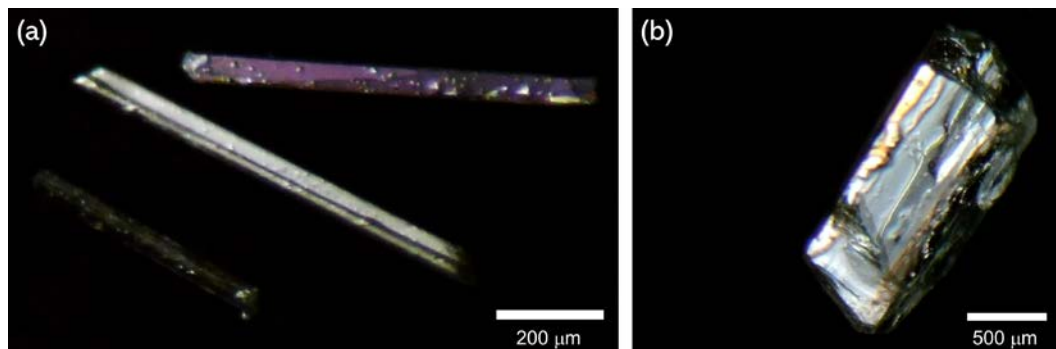

**Figure S5** - Crystalline habits of the BZMDSLС polymorphs: (a) form I and (b) form II.

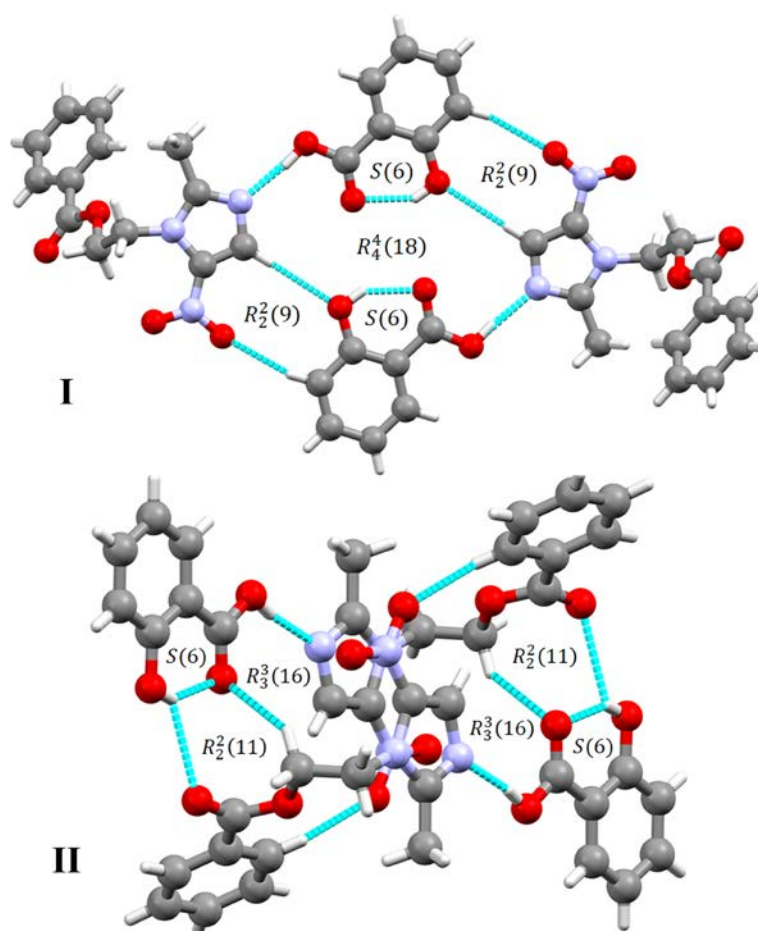

**Figure S6.** Synthons and graph sets of polymorphs I and II of BZMDSLС.

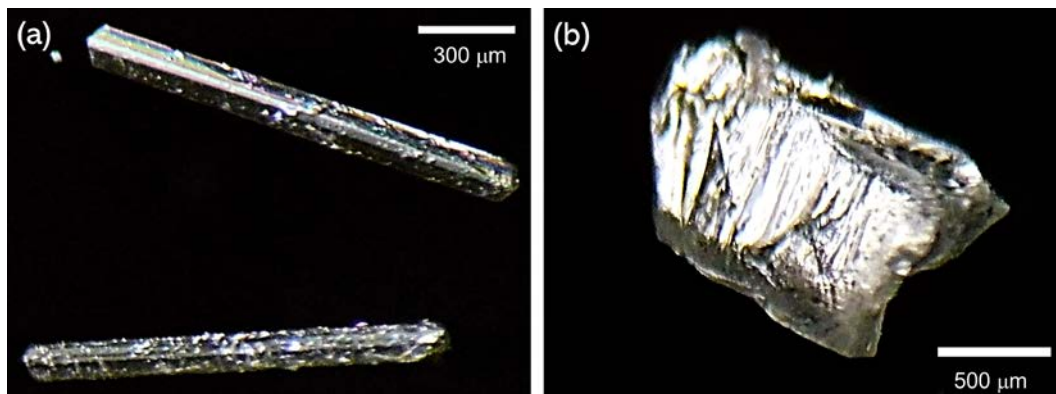

**Figure S7.** Crystalline habits of polymorphs of cocrystals BZMDFMA. a) form I b) form II.

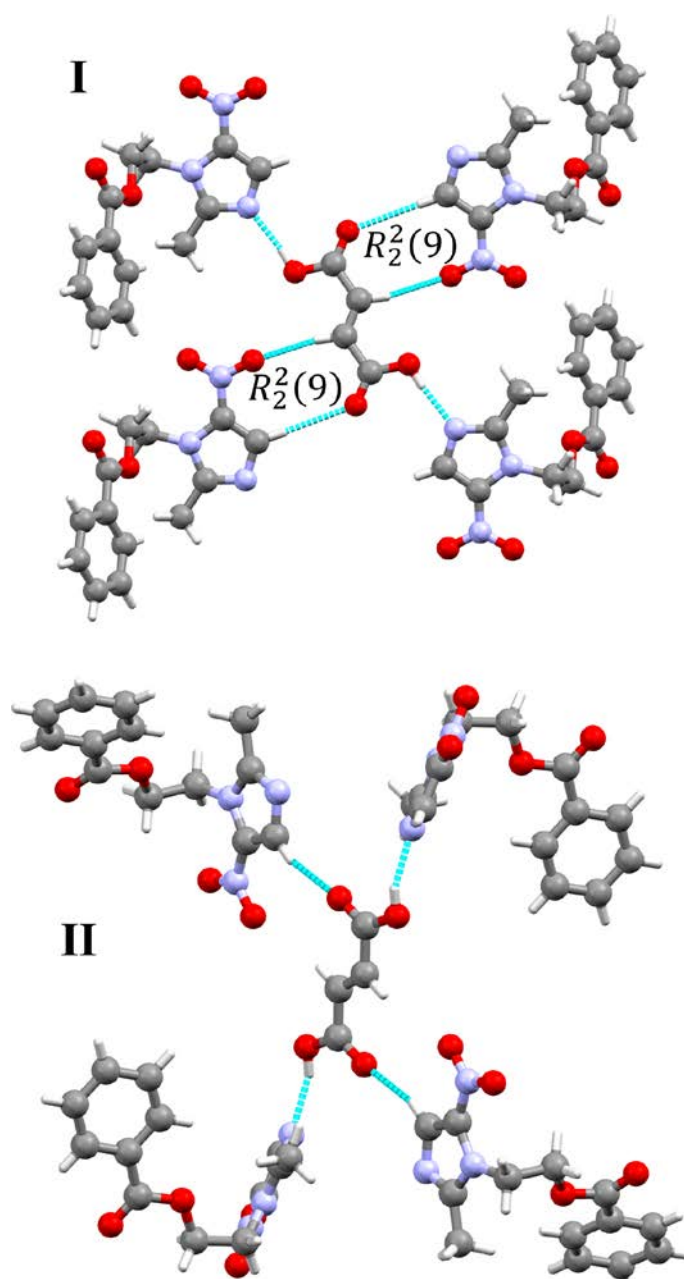

**Figure S8.** Synthons and graph sets of polymorphs I and II of BZMDFMA.



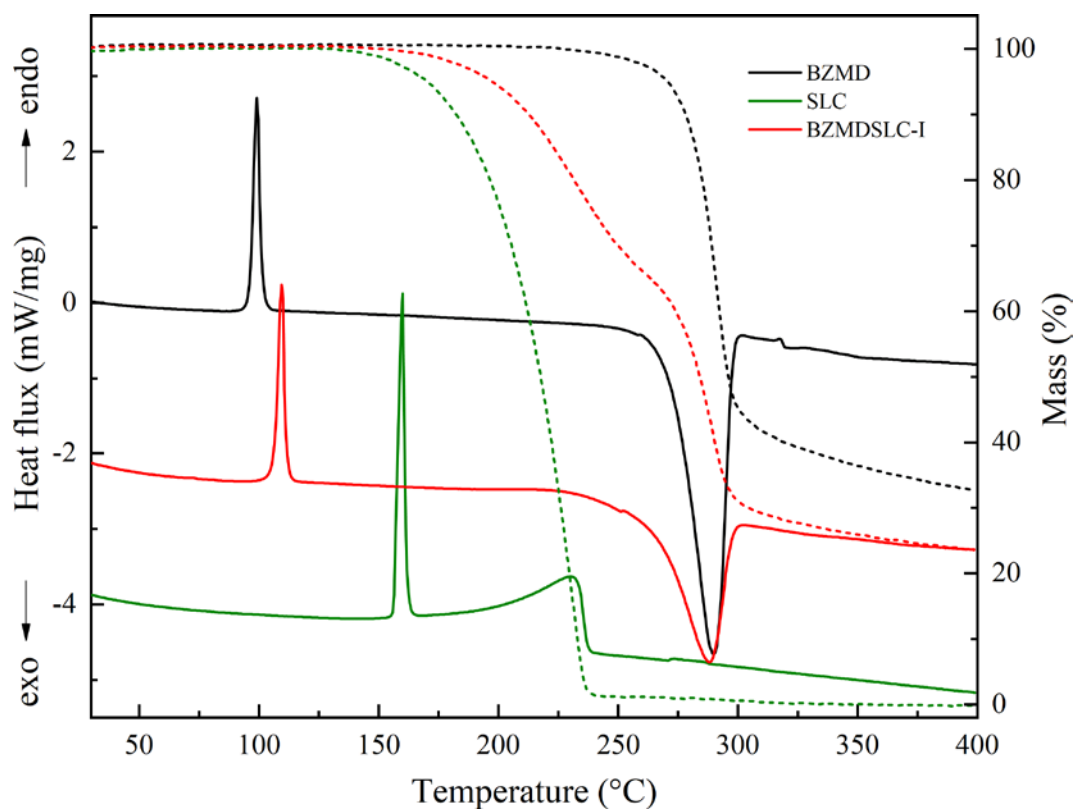

**Figure S9.** Simultaneous thermogravimetry and differential scanning calorimetry of BZMDSLCL-I, BZMD and SLC.

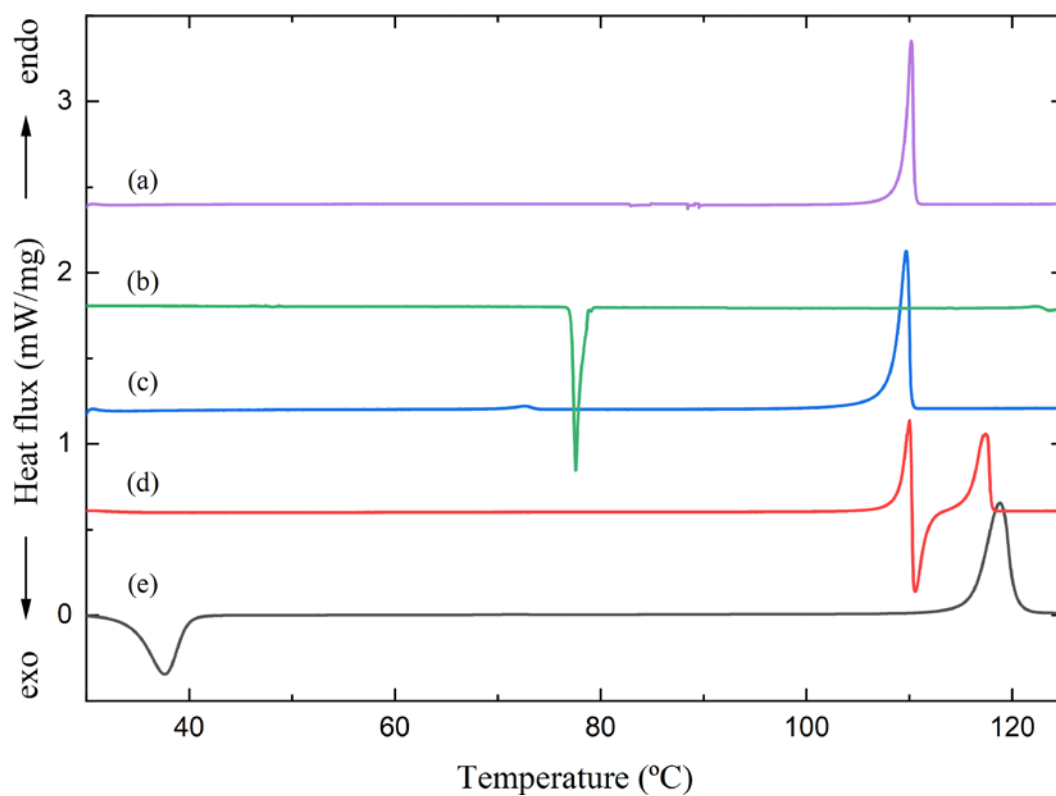

**Figure S10.** Representative DSC curves of BZMDSLCL. (a)-(c) form I heating/cooling/heating cycles. (d) heating exhibiting the melting of form I recrystallizing into form II. (e) amorphous sample recrystallizing into form II.

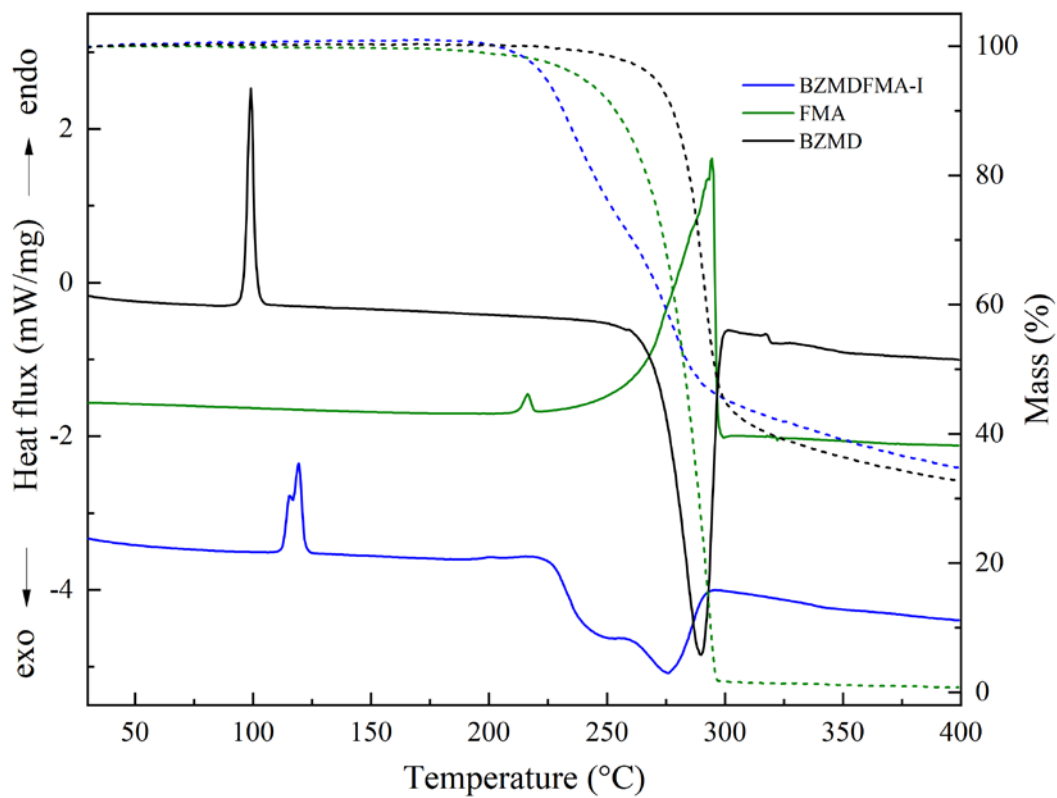

**Figure S11.** Simultaneous thermogravimetry and differential scanning calorimetry of BZMDFMA-I, BZMD, and FMA.
